1 Interneuron diversity is required for compartment-specific feedback  
2 inhibition

3 Joram Keijser<sup>1,2</sup> and Henning Sprekeler<sup>1, 3, \*</sup>

4 <sup>1</sup>Modelling of Cognitive Processes, Institute of Software Engineering and Theoretical Computer Science, Technische  
5 Universität Berlin, 10587 Berlin, Germany

6 <sup>2</sup>Charité – Universitätsmedizin Berlin, Einstein Center for Neurosciences Berlin, 10117, Berlin, Germany

7 <sup>3</sup>Bernstein Center for Computational Neuroscience Berlin, 10115 Berlin, Germany

8 \*Correspondence addressed to [h.sprekeler@tu-berlin.de](mailto:h.sprekeler@tu-berlin.de)

## 9 Abstract

10 Cortical inhibitory interneurons consist of many subtypes that have been associated with different functions.  
11 Here we use an optimization approach to show that two classes of interneurons are necessary to implement  
12 compartment-specific feedback inhibition to pyramidal cells. The two classes resemble PV-expressing and  
13 SST-expressing interneurons in their connectivity and short-term plasticity, suggesting a functional role for  
14 their diverse characteristics.

## 15 1 Main Text

16 Cortical inhibitory interneurons are very diverse [1]. The two most common interneuron classes—parvalbumin  
17 (PV) positive and somatostatin (SST) positive cells—differ prominently in their connectivity and synaptic  
18 dynamics: whereas PV basket cells typically receive short-term depressing input from excitatory pyramidal  
19 cells and in turn inhibit their soma and proximal dendrites, SST Martinotti cells receive short-term facili-  
20 tating input and inhibit distal dendrites [2]. But what is the function of these differences between PV and  
21 SST interneurons?

22  
23 One of inhibition’s core functions is to prevent run-away excitation [3] by means of feedback inhibition  
24 that tracks excitatory inputs. This has led to the concept of excitation-inhibition (E/I) balance [4]. E/I  
25 balance is thought to shape cortical dynamics [4] and computations [5, 6] and can be established by means of  
26 inhibitory forms of plasticity [7]. Selective disruptions of E/I balance are thought to play a key role during  
27 learning [8].

28  
29 Originally conceived as a balance on average [4], E/I balance turned out to be specific to sensory stimuli  
30 [9], in time [10, 11], across neurons [12] and to neural activation patterns [13]. Given the high specificity of E/I  
31 balance, we hypothesized that excitation and inhibition also balance across different neuronal compartments  
32 [14], and that this could be mediated at least in part by compartment-specific feedback inhibition. Different  
33 neuronal compartments often receive input from different sources [15] and display complex nonlinear dy-  
34 namics [16, 17] that shape how these inputs are integrated [18]. We hypothesized that compartment-specific  
35 feedback inhibition requires a reflection of this intracellular complexity in the surrounding inhibitory cir-  
36 cuitry. In particular, we hypothesized that it creates a need for different interneuron classes. If this were  
37 true, interneuron classes should emerge in a recurrent network model that is optimized for a compart-  
38 ment-specific E/I balance.

39

40 To test this idea, we simulated spiking networks comprising pyramidal cells (PCs) and interneurons (INs)  
41 (see Methods). The PCs were described by a two-compartment model consisting of a soma and an apical  
42 dendrite. The parameters of this model were previously fitted to capture dendrite-dependent bursting [19].  
43 PCs received time-varying inputs in both the somatic and the dendritic compartment. INs were described by  
44 point neurons that receive excitatory inputs from the PCs and return feedback inhibition to the PCs. The  
45 strength of all synaptic connections in the network and the short-term plasticity of the PC  $\rightarrow$  IN connections  
46 were optimized to balance excitation and inhibition across PC compartments, by means of gradient descent  
47 ([20], see Methods).

48

49 Before optimization, interneurons formed a single, homogeneous group (Fig. 1a, top). Most inhibited  
50 both somatic and dendritic compartments (Fig. 1b, top) and PC  $\rightarrow$  IN connections showed non-specific  
51 synaptic dynamics (Fig. 1c, top). Moreover, excitation and inhibition were poorly correlated, particularly  
52 in the dendrite (Pearson correlation coefficients 0.55 (soma) & 0.04 (dendrite)), suggesting that the network  
53 did not generate compartment-specific feedback inhibition (Fig. 1d, top).

54

55 During optimization, the interneurons robustly split into two groups (Fig. 1a, bottom) with different  
56 connectivity (Fig. 1b, bottom) and short-term plasticity (Fig. 1c, bottom). One group received short-term  
57 depressing inputs from PCs and preferentially targeted their somatic compartment, akin to PV interneurons.  
58 The other group received short-term facilitating inputs from PCs and targeted their dendritic compartment,  
59 akin to SST interneurons. Excitation and inhibition were now positively correlated in both compartments  
60 (Pearson correlation coefficients 0.77 (soma) & 0.61 (dendrite); Fig. 1d, bottom).

61

62 To confirm the benefit of non-overlapping interneuron classes, we performed control simulations in which  
63 each interneuron was pre-assigned to target either the soma or the dendrite, while synaptic strengths and  
64 short-term plasticity were optimized. Consistent with a benefit of a specialization, the correlation of exci-  
65 tation and inhibition in the two compartments was as high as in fully self-organized networks (Fig. A.1).  
66 Optimized networks with pre-assigned interneuron classes also showed the same diversification in their short-  
67 term plasticity, resembling that of PV and SST neurons (Figs. A.1, A.2).

68

69 Because interneurons subtypes also differ in their connectivity to other interneurons [21, 22], we included  
70 IN  $\rightarrow$  IN synapses in our optimization. After classifying INs as putative PV and SST neurons using a binary  
71 Gaussian mixture model, we found that the connections between the interneuron classes varied systematically

72 in strength. While  $PV \leftrightarrow PV$  connections,  $PV \rightarrow SST$  connections and  $SST \leftrightarrow SST$  connections were similar in  
73 strength on average,  $SST \rightarrow PV$  were consistently stronger (Fig. A.3a). To investigate which connections were  
74 necessary, we performed simulated knockout experiments in networks with pre-assigned interneuron classes,  
75 in which we removed individual connections types. We found that only  $PV \rightarrow SST$  connections were neces-  
76 sary for a dendritic E/I balance (Fig. A.3b). This was confirmed by a mathematical analysis of a simplified  
77 network model, which suggests that disynaptic  $PC \rightarrow PV \rightarrow SST$  inhibition is necessary to prevent somatic  
78 inputs from generating dendritic inhibition (Section B.1). Although earlier work did not find  $PV \rightarrow SST$   
79 connectivity in the primary visual cortex of young mice [21], these connections are present in primary visual  
80 and somatosensory cortex of older animals [22].

81

82 For compartment-specific feedback inhibition, interneurons have to retrieve the somatic and dendritic  
83 input to PCs from the spiking activity of the PCs (Fig. 2a). By which mechanism is this decoding achieved?  
84 Recently, it was proposed that the electrophysiological properties of PCs support a multiplexed neural code  
85 that simultaneously represents somatic and dendritic inputs in temporal spike patterns ([23], Fig. 2b). In  
86 this code, somatic input increases the number of spikes (event rate, see Methods), whereas dendritic in-  
87 put increases the probability that a spike is converted to a burst (burst probability). Providing soma- or  
88 dendrite-specific inhibition then amounts to decoding the event rate or burst probability, respectively. Such  
89 a decoding can be achieved in circuits with short-term plasticity and feedforward inhibition [23], and we  
90 expected that our network arrived at a similar decoding scheme.

91

92 We tested this hypothesis by injecting current pulses to PC somata and dendrites (see Methods). Stronger  
93 dendritic input increased the burst probability, which increased the SST rate, which increased dendritic in-  
94 hibition (Fig. 2c-e, top). Analogously, stronger somatic input increased the event rate, which increased the  
95 PV rate, which increased somatic inhibition (Fig. 2c-e, bottom). Importantly, inhibition was specific to each  
96 compartment: Because PV neurons were selectively activated by PC events, somatic inhibition was largely  
97 unaffected by dendritic excitation. Similarly, SST neurons were selectively activated by PC bursts, such  
98 that dendritic inhibition was largely unaffected by somatic excitation (Fig. A.4). In the model, interneurons  
99 therefore provide compartment-specific inhibition by demultiplexing the neural code used by the PCs. Note  
100 that the balance is less tight in time in the dendrites than in the somata (cf. Fig. 2e top and bottom), a  
101 consequence of the delay between burst onset and SST activation [24].

102

103 So far we assumed that PC somata and dendrites receive uncorrelated input. Recent work, however,  
104 suggests that somatic and dendritic activity are correlated [25, 26], potentially reducing the need for

105 compartment-specific inhibition. We therefore tested how correlated inputs affect interneuron specializa-  
106 tion by optimizing separate networks for different input correlations. We found that increasing correlation  
107 between somatic and dendritic inputs gradually reduced the separation between the interneuron classes  
108 (Fig 3a,b). For high input correlation, optimized networks contained a continuum in their connectivity and  
109 short-term plasticity (Fig. 3a,b). However, the presence of short-term plasticity was necessary for a dendritic  
110 E/I balance for a range of input correlations (Fig. 3c). Note that although distinct interneuron populations  
111 were not necessary for the case of high input correlation, the presence of IN classes was not harmful for E/I  
112 balance. A pre-assignment of the interneurons into classes maintained the E/I correlation in both compart-  
113 ments and for any correlation level (Fig A.2a). Finally, we found that interneuron specialization degraded  
114 with increasing baseline activity of the INs (Fig A.5), because high firing rates allow non-specialized inhi-  
115 bition to cancel out (see mathematical analysis in Section B.2). However, a pre-assignment of interneurons  
116 into classes again maintained the E/I correlation for different baseline activity levels (Fig A.2c).

117

118 The model predicts that, first, PV and SST rates should correlate with somatic and dendritic activity,  
119 respectively (Fig. 2). Second, inhibiting SST neurons [27] or manipulating PC  $\rightarrow$  SST facilitation [28] should  
120 increase PC bursting. On a higher level, the model suggests a relation between the biophysical properties of  
121 excitatory neurons and the surrounding interneuron circuitry. This is consistent, e.g., with the finding that  
122 the prevalence of pyramidal cells and dendrite-targeting Martinotti cells seems to be correlated across brain  
123 regions [29]. Combined with more complex biophysical models, the suggested optimization approach could  
124 hence provide an inroad to understanding further properties of interneuron classes and their circuitry.

## 125 **Acknowledgements**

126 J.K. was supported by a PhD scholarship from the Einstein Center for Neurosciences Berlin. We thank  
127 Loreen Hertäg, Robert Tjarko Lange, Laura Bella Naumann, and Filip Vercauysse for comments on earlier  
128 drafts.

## 129 **Author contribution**

130 J.K and H.S. designed the study. J.K. performed the experiments and analyzed the data. J.K. and H.S.  
131 wrote the manuscript.

## 132 **Declaration of interests**

133 The authors declare no competing interests.

## 134 **Code availability**

135 Code and trained models will be made publicly available upon publication.

## 2 References

- 136
- 137 [1] Robin Tremblay, Soohyun Lee, and Bernardo Rudy. Gabaergic interneurons in the neocortex: from cellular properties to  
138 circuits. *Neuron*, 91(2):260–292, 2016.
- 139 [2] Alex Reyes, Rafael Lujan, Andrej Rozov, Nail Burnashev, Peter Somogyi, and Bert Sakmann. Target-cell-specific facilita-  
140 tion and depression in neocortical circuits. *Nature neuroscience*, 1(4):279–285, 1998.
- 141 [3] Jeffrey S Isaacson and Massimo Scanziani. How inhibition shapes cortical activity. *Neuron*, 72(2):231–243, 2011.
- 142 [4] Carl Van Vreeswijk and Haim Sompolinsky. Chaos in neuronal networks with balanced excitatory and inhibitory activity.  
143 *Science*, 274(5293):1724–1726, 1996.
- 144 [5] Guillaume Hennequin, Tim P Vogels, and Wulfram Gerstner. Optimal control of transient dynamics in balanced networks  
145 supports generation of complex movements. *Neuron*, 82(6):1394–1406, 2014.
- 146 [6] Daniel B Rubin, Stephen D Van Hooser, and Kenneth D Miller. The stabilized supralinear network: a unifying circuit  
147 motif underlying multi-input integration in sensory cortex. *Neuron*, 85(2):402–417, 2015.
- 148 [7] Tim P Vogels, Henning Sprekeler, Friedemann Zenke, Claudia Clopath, and Wulfram Gerstner. Inhibitory plasticity  
149 balances excitation and inhibition in sensory pathways and memory networks. *Science*, 334(6062):1569–1573, 2011.
- 150 [8] Johannes J Letzkus, Steffen BE Wolff, and Andreas Lüthi. Disinhibition, a circuit mechanism for associative learning and  
151 memory. *Neuron*, 88(2):264–276, 2015.
- 152 [9] Michael Wehr and Anthony M Zador. Balanced inhibition underlies tuning and sharpens spike timing in auditory cortex.  
153 *Nature*, 426(6965):442–446, 2003.
- 154 [10] Michael Okun and Ilan Lampl. Instantaneous correlation of excitation and inhibition during ongoing and sensory-evoked  
155 activities. *Nature neuroscience*, 11(5):535–537, 2008.
- 156 [11] Alfonso Renart, Jaime De La Rocha, Peter Bartho, Liad Hollender, Néstor Parga, Alex Reyes, and Kenneth D Harris. The  
157 asynchronous state in cortical circuits. *science*, 327(5965):587–590, 2010.
- 158 [12] Mingshan Xue, Bassam V Atallah, and Massimo Scanziani. Equalizing excitation–inhibition ratios across visual cortical  
159 neurons. *Nature*, 511(7511):596–600, 2014.
- 160 [13] Aanchal Bhatia, Sahil Moza, and Upinder Singh Bhalla. Precise excitation-inhibition balance controls gain and timing in  
161 the hippocampus. *Elife*, 8:e43415, 2019.
- 162 [14] Daniel Maxim Iascone, Yujie Li, Uygur Sümbül, Michael Doron, Hanbo Chen, Valentine Andreu, Finola Goudy, Heike  
163 Blockus, Larry F Abbott, Idan Segev, et al. Whole-neuron synaptic mapping reveals spatially precise excitatory/inhibitory  
164 balance limiting dendritic and somatic spiking. *Neuron*, 2020.
- 165 [15] Leopoldo Petreanu, Tianyi Mao, Scott M Sternson, and Karel Svoboda. The subcellular organization of neocortical  
166 excitatory connections. *Nature*, 457(7233):1142–1145, 2009.
- 167 [16] Michael London and Michael Häusser. Dendritic computation. *Annu. Rev. Neurosci.*, 28:503–532, 2005.
- 168 [17] Panayiota Poirazi and Athanasia Papoutsis. Illuminating dendritic function with computational models. *Nature Reviews*  
169 *Neuroscience*, pages 1–19, 2020.
- 170 [18] Matthew Larkum. A cellular mechanism for cortical associations: an organizing principle for the cerebral cortex. *Trends*  
171 *in neurosciences*, 36(3):141–151, 2013.

- 172 [19] Richard Naud, Brice Bathellier, and Wulfram Gerstner. Spike-timing prediction in cortical neurons with active dendrites.  
173 *Frontiers in computational neuroscience*, 8:90, 2014.
- 174 [20] Friedemann Zenke and Surya Ganguli. Superspike: Supervised learning in multilayer spiking neural networks. *Neural*  
175 *computation*, 30(6):1514–1541, 2018.
- 176 [21] Carsten K Pfeffer, Mingshan Xue, Miao He, Z Josh Huang, and Massimo Scanziani. Inhibition of inhibition in visual  
177 cortex: the logic of connections between molecularly distinct interneurons. *Nature neuroscience*, 16(8):1068–1076, 2013.
- 178 [22] Mahesh M Karnani, Jesse Jackson, Inbal Ayzenshtat, Jason Tucciarone, Kasra Manoocheri, William G Snider, and Rafael  
179 Yuste. Cooperative subnetworks of molecularly similar interneurons in mouse neocortex. *Neuron*, 90(1):86–100, 2016.
- 180 [23] Richard Naud and Henning Sprekeler. Sparse bursts optimize information transmission in a multiplexed neural code.  
181 *Proceedings of the National Academy of Sciences*, 115(27):E6329–E6338, 2018.
- 182 [24] Frederic Pouille and Massimo Scanziani. Routing of spike series by dynamic circuits in the hippocampus. *Nature*,  
183 429(6993):717–723, 2004.
- 184 [25] Lou Beaulieu-Laroche, Enrique HS Toloza, Norma J Brown, and Mark T Harnett. Widespread and highly correlated  
185 somato-dendritic activity in cortical layer 5 neurons. *Neuron*, 103(2):235–241, 2019.
- 186 [26] Valerio Francioni, Zahid Padamsey, and Nathalie L Rochefort. High and asymmetric somato-dendritic coupling of v1 layer  
187 5 neurons independent of visual stimulation and locomotion. *Elife*, 8:e49145, 2019.
- 188 [27] Sébastien Royer, Boris V Zemelman, Attila Losonczy, Jinhyun Kim, Frances Chance, Jeffrey C Magee, and György Buzsáki.  
189 Control of timing, rate and bursts of hippocampal place cells by dendritic and somatic inhibition. *Nature neuroscience*,  
190 15(5):769–775, 2012.
- 191 [28] Emily L Sylwestrak and Anirvan Ghosh. Elfn1 regulates target-specific release probability at ca1-interneuron synapses.  
192 *Science*, 338(6106):536–540, 2012.
- 193 [29] Federico Scala, Dmitry Kobak, Shen Shan, Yves Bernaerts, Sophie Laturus, Cathryn Rene Cadwell, Leonard Hartmanis,  
194 Emmanouil Froudarakis, Jesus Ramon Castro, Zheng Huan Tan, et al. Layer 4 of mouse neocortex differs in cell types  
195 and circuit organization between sensory areas. *Nature communications*, 10(1):1–12, 2019.
- 196 [30] Misha Tsodyks, Klaus Pawelzik, and Henry Markram. Neural networks with dynamic synapses. *Neural computation*,  
197 10(4):821–835, 1998.
- 198 [31] Adam Paszke, Sam Gross, Francisco Massa, Adam Lerer, James Bradbury, Gregory Chanan, Trevor Killeen, Zeming  
199 Lin, Natalia Gimelshein, Luca Antiga, Alban Desmaison, Andreas Kopf, Edward Yang, Zachary DeVito, Martin Raison,  
200 Alykhan Tejani, Sasank Chilamkurthy, Benoit Steiner, Lu Fang, Junjie Bai, and Soumith Chintala. Pytorch: An imperative  
201 style, high-performance deep learning library. In H. Wallach, H. Larochelle, A. Beygelzimer, F. d’Alché-Buc, E. Fox, and  
202 R. Garnett, editors, *Advances in Neural Information Processing Systems 32*, pages 8024–8035. Curran Associates, Inc.,  
203 2019.
- 204 [32] Diederik P Kingma and Jimmy Ba. Adam: A method for stochastic optimization. *arXiv preprint arXiv:1412.6980*, 2014.
- 205 [33] Razvan Pascanu, Tomas Mikolov, and Yoshua Bengio. On the difficulty of training recurrent neural networks. In *Internation-*  
206 *ational conference on machine learning*, pages 1310–1318, 2013.
- 207 [34] F. Pedregosa, G. Varoquaux, A. Gramfort, V. Michel, B. Thirion, O. Grisel, M. Blondel, P. Prettenhofer, R. Weiss,  
208 V. Dubourg, J. Vanderplas, A. Passos, D. Cournapeau, M. Brucher, M. Perrot, and E. Duchesnay. Scikit-learn: Machine  
209 learning in Python. *Journal of Machine Learning Research*, 12:2825–2830, 2011.

210 [35] Matthew E Larkum, J Julius Zhu, and Bert Sakmann. A new cellular mechanism for coupling inputs arriving at different  
211 cortical layers. *Nature*, 398(6725):338–341, 1999.



212 **3 Figures**

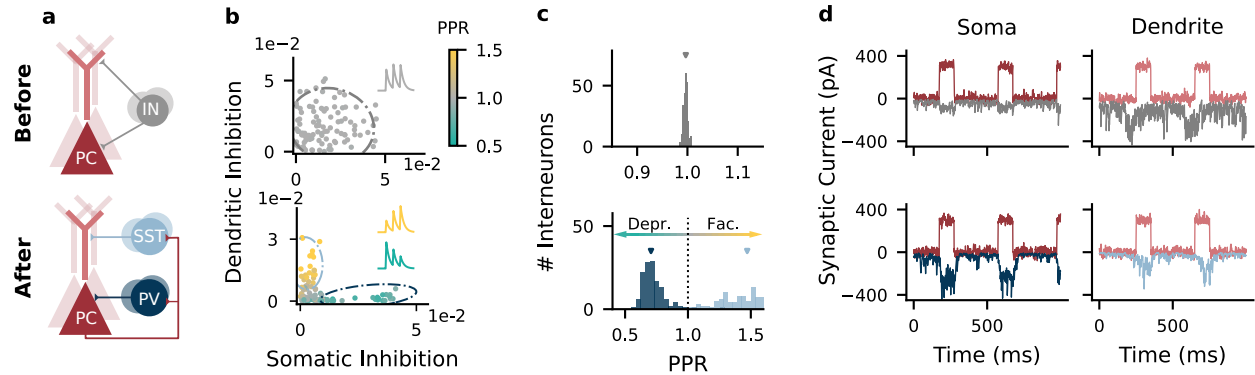

**Figure 1: Interneuron diversity emerges in networks optimized for compartment-specific inhibition** (a) Network structure before (top) and after optimization (bottom). PC, pyramidal cell; IN, interneuron; PV, parvalbumin-positive IN; SST, somatostatin-positive IN. Recurrent inhibitory connections among INs omitted for clarity. (b) Strength of somatic and dendritic inhibition from individual INs. Dashed lines: 95% density of a Gaussian distribution (top) and mixture of two Gaussian distributions (bottom) fitted to the connectivity and Paired Pulse Ratio (PPR) data of 5 networks (marginalized over PPR). (c) PPR distribution (data from 5 networks). Mean PPR before optimization: 1.00; after optimization: 0.73 (PV cluster,  $n = 133$ ) and 1.45 (SST cluster,  $n = 113$ ). (d) Excitatory (red) and inhibitory (top: gray, bottom: blue) currents onto PC compartments (average across  $N_E = 400$  PCs). Correlation between excitation and inhibition before optimization: 0.55 (soma) and 0.04 (dendrites). After optimization: 0.77 (soma) and 0.61 (dendrites).

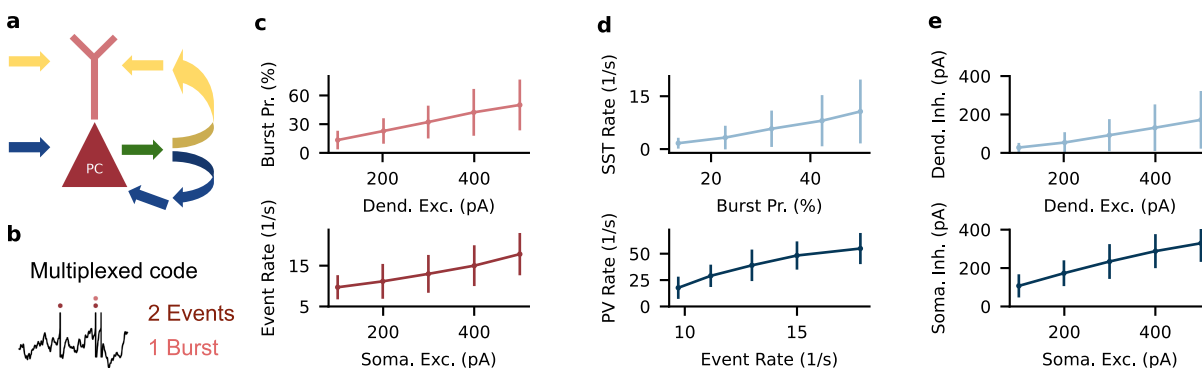

**Figure 2: The interneuron circuit decodes somatic and dendritic inputs to PCs.** (a) PC somata and dendrites receive uncorrelated input streams (yellow and blue) that, from PC output spikes (green), have to be separated into compartment-specific inhibition (yellow and blue). (b) PCs use a multiplexed neural code. Somatic input leads to events (singlets or bursts). Dendritic input converts singlets into bursts. (c) Top: Excitatory input to PC dendrites increases burst probability. Bottom: Excitatory input to PC somata increases event rate. Error bars indicate sd over 10 stimulus repetitions. (d) Top: SST rate increases with bursts probability. Bottom: PV rate increases with PC events. (e) Dendritic and somatic inhibition in PCs increase with dendritic and somatic excitation, respectively.

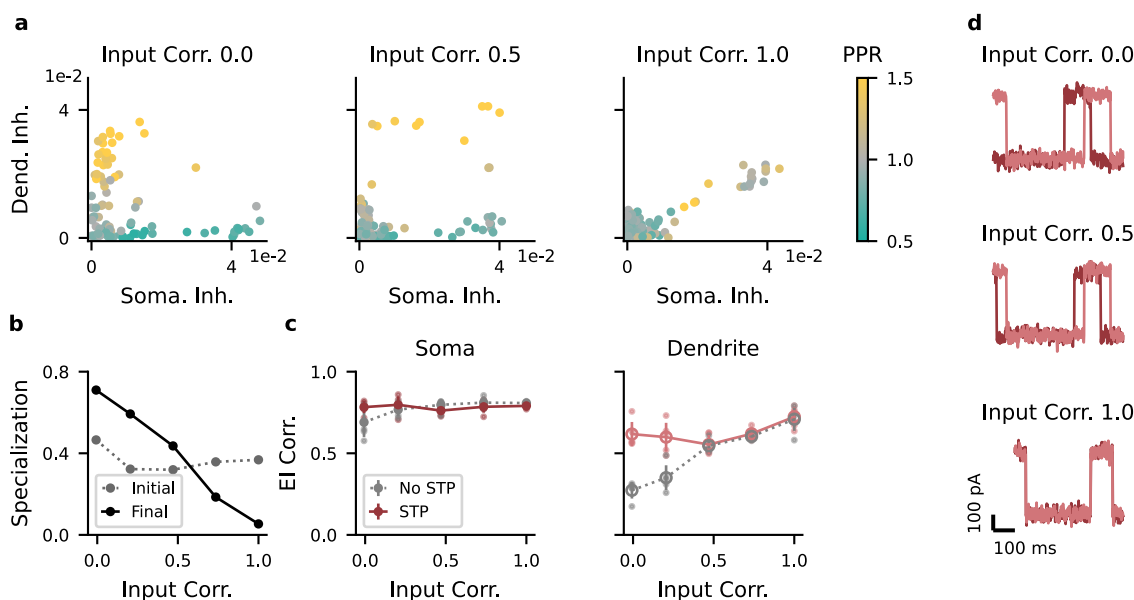

**Figure 3: Correlations between dendritic and somatic input reduce interneuron specialization.** (a) Strength of somatic vs. dendritic inhibition from all INs. Left, middle, right: input correlation coefficient 0 (low), 0.5 (medium), and 1 (high), respectively. (b) Specialization of IN→E weights. If each IN targets either soma or dendrites, the specialization is 1 (see Methods). Gray: specialization of initial random network; black: specialization after optimization. (c) Left: In the soma, excitation and inhibition are balanced across a broad range of input correlations, with or without short-term plasticity (STP). Right: In the dendrites, excitation and inhibition are balanced only with STP. Open circles, mean over 5 batches of 8 stimuli with random amplitudes (see Methods). Small filled circles, individual batches. (d) Examples for synaptic traces corresponding to correlation levels in a. Dark red, somatic current; light red, dendritic input.

## 213 4 Methods

### 214 4.1 Network Model

We simulated a fully connected spiking network model consisting of  $N_E$  pyramidal cells (PCs) and  $N_I$  interneurons (INs), as in earlier work [23]. PCs are described by a two-compartment model [19]. The membrane potential  $v^s$  in the somatic compartment is modeled as a leaky integrate-and-fire unit with spike-triggered adaptation:

$$\frac{dv^s}{dt} = -\frac{v^s - E_L}{\tau_s} + \frac{g_s f(v^d) + w^s + I^s}{C_s} \quad (1)$$

$$\frac{dw^s}{dt} = -\frac{w^s}{\tau_{s,w}} + b_s S(t). \quad (2)$$

Here,  $E_L$  denotes the resting potential,  $\tau_s$  the membrane time constant and  $C_s$  the capacitance of the soma.  $I^s$  is the external input, and  $w^s$  the adaptation variable, which follows leaky dynamics with time constant  $\tau_{s,w}$ , driven by the spike train  $S$  emitted by the soma.  $b_s$  controls the strength of the spike-triggered adaptation.  $v^d$  is the dendritic membrane potential, the conductance  $g_s$  controls how strongly the dendrite drives the soma, and  $f$  the nonlinear activation of the dendrite:

$$f(v) = 1/(1 + \exp(-(v - E_d)/D_d)). \quad (3)$$

The half-point  $E_d$  and slope  $D$  of the transfer function  $f$  control the excitability of the dendrite. When the membrane potential reaches the spiking threshold  $\vartheta$ , it is reset to the resting potential and the PC emits a spike. Every spike is followed by an absolute refractory period of  $\tau_r$ .

The dynamics of the dendritic compartment are given by:

$$\frac{dv^d}{dt} = -\frac{v^d - E_L}{\tau_d} + \frac{g_d f(v^d) + c_d K(t - \hat{t}) + w^d + I^d}{C_d} \quad (4)$$

$$\frac{dw^d}{dt} = -\frac{w^d}{\tau_{d,w}} + \frac{a_d(v^d - E_L)}{\tau_{d,w}}. \quad (5)$$

In addition to leaky membrane potential dynamics with time constant  $\tau_d$ , the dendrite shows a voltage-dependent nonlinear activation  $f$ , the strength of which is controlled by  $g_d$ . This nonlinearity allows the generation of dendritic plateau potentials ("calcium spikes"). Somatic spikes trigger backpropagating action potentials in the dendrite, modeled in the form of a boxcar kernel  $K$ , which starts 1ms after the spike and lasts 2ms. The amplitude of the backpropagating action potential is controlled by the parameter  $c_d$ . The

dendrite is subject to a voltage-activated adaptation current  $w^d$ , which limits the duration of the plateau potential. This adaptation follows leaky dynamics with time constant  $\tau_{d,w}$ . The strength of the adaptation is given by the parameter  $a_d$ . Note that the model excludes sub-threshold coupling from the soma to the dendrite.

The interneurons are modeled as leaky integrate-and-fire neurons:

$$\frac{dv^i}{dt} = -\frac{v^i - E_L}{\tau_i} + \frac{I^i}{C_i}, \quad (6)$$

with time constant  $\tau_i$ . Spike threshold, resting and reset potential, and refractory period are the same as for the PCs.

All neurons receive an external background current to ensure uncorrelated activity, which follows Ornstein-Uhlenbeck dynamics

$$\frac{dI^{x,bg}}{dt} = -\frac{I^{x,bg} - \mu_x}{\tau_{bg}} + \sigma_x \varepsilon. \quad (7)$$

Here,  $x \in \{s, d, i\}$  refers to the soma, dendrite, or interneuron, respectively, and  $\varepsilon$  is standard Gaussian white noise with zero mean and correlation  $\langle \varepsilon(t)\varepsilon(t') \rangle = \delta(t - t')$ .

In addition, the somatic and dendritic compartments received step currents mimicking external signals (see Section 4.2), as well as recurrent inhibitory inputs. The recurrent input to compartment  $x \in \{s, d\}$  of the  $i$ th principal cell was given by

$$I_i^{x,inh}(t) = -\sum_{j=1}^{N_I} |W_{ij}^{I \rightarrow x}| s^j(t). \quad (8)$$

where  $s^j$  is the synaptic trace that is increased at each presynaptic spike and decays with time constant  $\tau_{syn}$  otherwise:

$$\frac{ds}{dt} = -\frac{s}{\tau_{syn}} + S.$$

The compartment-specific inhibitory weight matrices  $W^{I \rightarrow x}$ ,  $x \in \{s, d\}$  were optimized; the absolute value in Eq. 8 ensured positive weights.

The recurrent input to the  $i$ th interneuron was given by:

$$I_i^{rec} = \sum_{j=1}^{N_E} |W_{ij}^{E \rightarrow I}| \mu_{ij}(t) s^j(t) - \sum_{k=1} |W_{ik}^{I \rightarrow I}| s^k(t). \quad (9)$$

The function  $\mu_{ij}(t)$  implements short-term plasticity according to the Tsodyks-Markram model [30].  $\mu(t)$  is the product of a utilization variable  $u$  and a recovery variable  $R$  that obey the dynamics

$$\frac{du}{dt} = -\frac{u - U}{\tau_u} + (1 - u) \cdot F \cdot S, \quad (10)$$

$$\frac{dR}{dt} = -\frac{R - 1}{\tau_R} - u \cdot R \cdot S. \quad (11)$$

215  $U$  is the initial release probability, which is optimized by gradient descent.  $F$  is the facilitation fraction, and  
 216  $\tau_R, \tau_u$  are the time constants of facilitation and depression, respectively. All parameter values are listed in  
 217 Table 1.

218

219 Finally, the network parameters were scaled so that the membrane voltages ranged between  $E_L = 0$   
 220 and  $\vartheta = 1$ . The scaling allowed weights of order  $1/\sqrt{N}$ , mitigating vanishing or exploding gradients during  
 221 optimization. All optimization parameters are listed in Table 2.

## 222 4.2 Optimization

We used gradient descent to find weights  $W$  and initial release probabilities  $U$  that minimize the difference between excitation and inhibition in both compartments:

$$\mathcal{L} = \sum_{t=1}^T \sum_{i=1}^{N_E} (E^s(t) + I_i^s(t))^2 + (E^d(t) + I_i^d(t))^2. \quad (12)$$

223  $E_i^x$  and  $I_i^x$  are the total excitatory and inhibitory input to compartment  $x \in \{s, d\}$  of PC  $i$ . To speed up the  
 224 optimization process, all output synapses from a given neuron to a given compartment type had the same  
 225 strength, i.e., the optimization of the output synapses is performed for  $N_I \times 2$  parameters. For the input  
 226 synapses onto the INs, weight and initial release probability were optimized independent for all  $N_E \times N_I$   
 227 synapses.

228

To achieve small interneuron rates necessary for interneuron specialization (Fig. A.5), we subtracted the

mean background input from  $E_i^x$ :

$$I_i^x(t) = E_i^x(t) - \mu_x \quad (13)$$

To propagate gradients through the spiking non-linearity, we replaced its derivative with the derivative of a smooth approximation [20]

$$\sigma(v) = \frac{1}{(1 + \beta|v - \vartheta|)^2}. \quad (14)$$

229 We used the machine learning framework PyTorch [31] to simulate the differential equations (forward Euler  
 230 with step size 1 ms), compute the gradients of the objective  $\mathcal{L}$  using automatic differentiation, and update  
 231 the network parameters using Adam [32]. The optimized parameters were initialized according to the dis-  
 232 tributions listed in Table 2. We simulated the network response to batches of 8 trials of 600 ms, consisting  
 233 of 100 ms pulses given at 2.5 Hz. The pulse amplitudes were drawn uniformly and independently for soma  
 234 and dendrites from the set  $\{100, 200, 300, 400\}$ . Training converged within 200 batches (parameter updates).  
 235 Before each parameter update, the gradient values were clipped between  $-1$  and  $1$  to mitigate exploding  
 236 gradients [33]. After each update, the initial release probability was clipped between 0 and 1 to avoid  
 237 unphysiological values.

| Symbol           | Value             | Unit | Description                           |
|------------------|-------------------|------|---------------------------------------|
| $N_E$            | 400               | -    | Number of exc. neurons                |
| $N_I$            | 100               | -    | Number of inh. neurons                |
| $E_L$            | -70               | mV   | reversal and reset potential          |
| $\vartheta$      | -50               | mV   | spiking threshold                     |
| $\tau_{s/d/i}$   | 16 / 7 / 10       | ms   | time const. soma/ dend./inh. membrane |
| $\tau_r$         | 3                 | ms   | refractory time soma and inh.         |
| $g_{s/d}$        | 1300 / 1200       | pA   | Coupling from dend to soma            |
| $C_{s/d/i}$      | 370 / 170 / 100   | pF   | Conductance of soma/dend./inh.        |
| $\tau_{s/d,w}$   | 100 / 30          | ms   | Time const. adaptation soma/dend.     |
| $b_s$            | -200              | pA   | Spike-triggered adaptation (soma)     |
| $a_d$            | -13               | nS   | Voltage-driven adaptation (dend)      |
| $c_d$            | 2600              | pA   | Coupling soma to dend.                |
| $E_d$            | -38               | mV   | position dend. nonlinearity           |
| $D_d$            | 6                 | mV   | steepness of dend. nonlinearity       |
| $\mu_{s/d/i}$    | 400 / -300 / -100 | pA   | mean background input soma/dend./inh. |
| $\sigma_{s/d/i}$ | 450 / 450 / 400   | pA   | sd background input                   |
| $\tau_{bg}$      | 2                 | ms   | time const. background input          |
| $\tau_{syn}$     | 5                 | ms   | time const. synapses                  |
| $\tau_u$         | 100               | ms   | time const. facilitation              |
| $\tau_R$         | 100               | ms   | time const. depression                |
| $F$              | 0.1               | -    | facilitation jump                     |

**Table 1:** Parameter values for network simulation.

| Symbol                | Value / Init. Distribution | Dimensions       | Description                        |
|-----------------------|----------------------------|------------------|------------------------------------|
| $U$                   | $\mathcal{U}(0.1, .25)$    | $N_E \times N_I$ | Initial release prob.              |
| $W^{E \rightarrow I}$ | $\mathcal{N}(0, 1/N_E)$    | $N_E \times N_I$ | Exc. to Inh. weight                |
| $W^{I \rightarrow I}$ | $\mathcal{N}(0, 1/N_I)$    | $N_I \times N_I$ | Inh. to Inh. weight                |
| $W^{I \rightarrow D}$ | $\mathcal{N}(0, 0.2/N_I)$  | $N_I \times 1$   | Inh. to Exc. Dend. weight          |
| $W^{I \rightarrow S}$ | $\mathcal{N}(0, 0.2/N_I)$  | $N_I \times 1$   | Inh. to Exc. Soma weight           |
| -                     | 1e-3                       | -                | learning rate for weights          |
| -                     | 4e-3                       | -                | learning rate for $U$              |
| $\beta$               | 10                         | -                | Slope spiking derivative           |
| -                     | 1.0                        | -                | Gradient (absolute value) clipping |

**Table 2:** Optimization parameters.  $\mathcal{U}(a, b)$ , uniform distribution on the interval  $(a, b]$ ;  $\mathcal{N}(0, \sigma^2)$ , normal distribution with mean 0 and variance  $\sigma^2$ .

### 238 4.3 Methods for Figures

#### 239 4.3.1 Figure 1

240 We measured the short-term plasticity of PC  $\rightarrow$  IN synapses by simulating their response to two EPSPs  
241 given 10 ms apart, a typical interspike interval within a burst. The PPR was computed as the ratio of  
242 the two EPSP amplitudes, such that a PPR  $> 1$  indicates short-term facilitation and a PPR  $< 1$  indicates  
243 short-term depression. The PPR of a single IN was defined as the mean PPR of all its excitatory afferents.  
244 Clustering of interneurons was done by fitting a single Gaussian (before optimization) or a mixture of two  
245 Gaussians (after optimization) to the three-dimensional distribution of inhibitory weights to the PC soma,  
246 to PC dendrites, and the PC $\rightarrow$ IN Paired Pulse Ratio (PPR). Both models were fitted using Scikit-learn [34]  
247 on pooled data from five networks, trained from different random initializations. The density models were  
248 fitted on 246 interneurons that were active (firing rate higher than 1 spk/s) and had a medium to strong  
249 projection to either soma or dendrites (weight bigger than 0.01). The dashed lines in Fig. 1b illustrate the  
250 two-dimensional marginal distributions of the somatic and dendritic inhibition. All PCs received the same  
251 time-varying input currents, consisting of 100 ms pulses of 300 pA, given at a rate of 2.5 Hz. Correlations  
252 between compartment-specific excitation and inhibition were computed between the the currents to the PC  
253 compartments, averaged across all PCs in the network.

#### 254 4.3.2 Figure 2

The definitions of burst rate, burst probability and event rate were taken from Naud & Sprekeler [23]: A  
burst was defined as multiple spikes occurring within 16 ms. The time of the first spike was taken as the  
time of the burst. An event was defined as a burst or a single spike. The instantaneous burst rate and event  
rate were computed by counting the number of bursts and events, respectively, in bins of 1ms and among

the population of PCs, and smoothing the result with a Gaussian filter (width: 2ms). The burst probability was defined as

$$\text{Burst Probability} = \frac{\text{Burst Rate}}{\text{Event Rate}} \times 100\%. \quad (15)$$

255 We injected current pulses of 100 ms duration to either soma or dendrite while injecting a constant current to  
256 the other compartment. Currents were varied in amplitude between 100 and 400 pA; the constant current  
257 was 0 pA. The figure shows the mean and standard deviation of the total network activity during 10 current  
258 pulses.

### 259 **4.3.3 Figure 3**

We varied the correlation between the inputs to soma and dendrites by generating repeating current pulses with different temporal offsets and optimized a network for each offset. The interneuron specialization was defined as

$$\text{specialization} = 1 - \frac{x^T y}{\|x\| \|y\|}, \quad (16)$$

260 where  $x$  and  $y$  are  $N_I$ -dimensional vectors containing the inhibitory weights onto soma and dendrites and  
261  $\|\cdot\|$  the  $L_2$  norm. If each neuron inhibits either somata or dendrites, but not both, the specialization will be  
262 1. If the weights are perfectly aligned (i.e., interneurons with a strong dendritic projection also have a strong  
263 somatic projection), the specialization will be 0. Here and in all figures, the EI correlation was computed as  
264 the correlation between the time series of the compartment-specific excitation and inhibition, after averaging  
265 across all PCs. Shown is the mean over 5 batches of 600 ms, where each batch consisted of 8 trials with  
266 amplitudes from  $\{100, 200, 300, 400\}$  pA, sampled independently for soma and dendrites.

### 267 **4.3.4 Figure A.1**

268 Before optimization, we assigned interneurons to inhibit either PC somata or dendrites by fixing their weights  
269 onto the other compartment to zero. Half of the interneurons was assigned to inhibit the soma, the other  
270 half was assigned to inhibit the dendrites. Otherwise, weights and initial release probabilities were optimized  
271 as before.



#### 272 **4.3.5 Figure A.2**

273 As for Fig. A.1, we assigned interneurons to inhibit either PC somata or dendrites. Here, we trained networks  
274 for different correlations between compartment-specific external inputs (cf. Fig. 3), and baseline activity  
275 levels (cf. Fig. A.5). We used the 10th percentile as a robust measure of minimum PV rate. The mean and  
276 sd PPR of the PV and SST populations computed over all INs that were active (rate larger than 1 spk/s)  
277 and provided a medium to strong inhibition to one PC compartment (weight bigger than 0.01).

#### 278 **4.3.6 Figure A.3**

279 Figure A.3a shows the connectivity strength over five networks. We first used the Gaussian mixture models  
280 to assign INs to PV or SST clusters, and then computed the mean connectivity between and within clusters  
281 for each network. For A.3b, we trained networks with predefined interneuron populations to control the  
282 interneuron connectivity. Connections between populations were knocked out by fixing them to zero during  
283 and after optimization. EI correlations are computed for 5 batches of 600 ms, where each batch consisted of  
284 8 trials with amplitudes from {100, 200, 300, 400} pA, sampled independently for soma and dendrites.

#### 285 **4.3.7 Figure A.4**

286 As in Fig. 2, we injected current pulses of 100ms duration to either soma or dendrite. Here, we injected a  
287 simultaneous pulses to the other compartment of amplitude 0, 200 or 400 pA.

#### 288 **4.3.8 Figure A.5**

The minimum rate of PV neurons was controlled indirectly, by varying the baseline inhibitory target current to the soma—A larger baseline requires a higher minimum PV rate. We varied the minimum inhibitory current by subtracting only a fraction  $\alpha$  of the baseline excitatory current:

$$I^x(t) = E^x(t) - \alpha \cdot \mu_x, \quad (17)$$

289 cf. Eq. (13). In the simulations, we varied  $\alpha$  between 1 and 0.8, leading to a minimum PV rate between 1  
290 spk/s, and 9 spk/s.

## 291 A Supplementary Figures

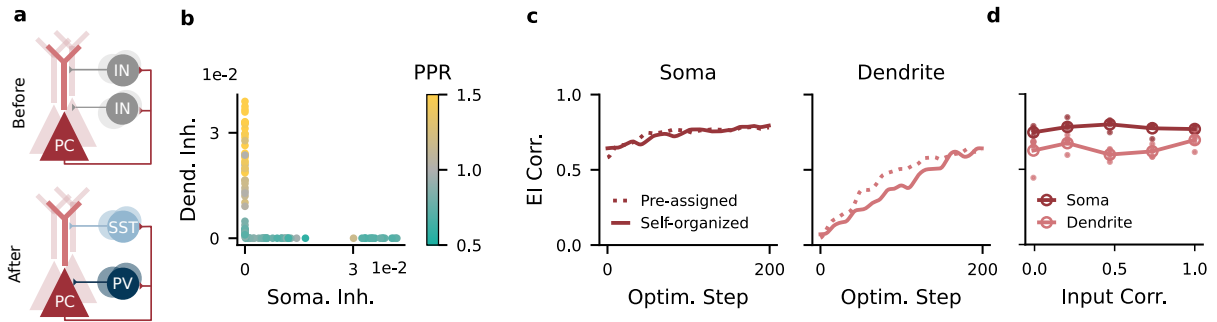

**Figure A.1: Non-overlapping interneuron populations achieve compartment-specific inhibition.** (a) Before optimization, interneurons are assigned to inhibit a single compartment. The optimization determines the synaptic strengths and the short-term plasticity. (b) Compartment-specific inhibition from active INs after optimization. Mean PPR: 0.78 (PV), 1.21 (SST). (c) Correlation between excitation and inhibition over the course of the optimization. Solid line: INs were not assigned to a single compartment (Self-organized). Dashed line: INs were assigned to a single compartment (Pre-assigned). Data is smoothed with a Gaussian kernel (width: 5). (d) EI correlation of pre-assigned networks for different correlation levels between compartment-specific external inputs.

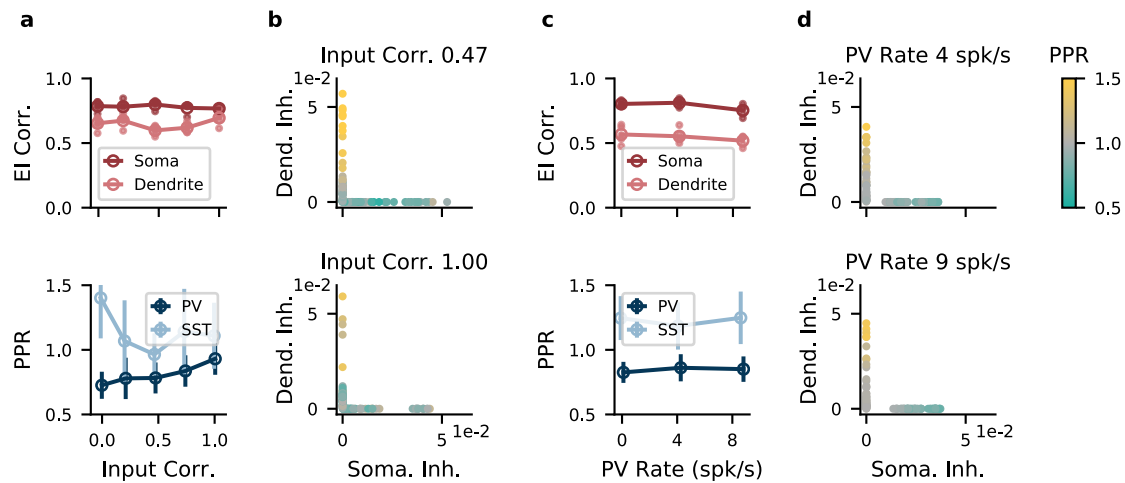

**Figure A.2: Non-overlapping interneuron populations achieve compartment-specific inhibition for a range of input statistics.** (a) Top, performance as measured by compartment-specific correlation between excitation and inhibition of networks trained on different correlations between compartment-specific excitatory inputs. Open circles, mean over 5 batches of 8 stimuli with random amplitudes (see Methods). Small filled circles, individual batches. Here and in the other panels, the interneurons were assigned to inhibit only the soma or only the dendrites. Bottom, interneuron specialization as measured by Paired Pulse Ratio (PPR) decreases with input correlations. Error bars denote sd over IN populations. (b) Strength of somatic and dendritic inhibition from individual INs. Top, medium input correlation (0.47); bottom, high input correlation (1.00). Color indicates PPR. (c) Top, as (a) but as function of minimum PV rate. Bottom, interneuron specialization as measured by Paired Pulse Ratio (PPR) is not influenced by minimum PV rate. (d) Strength of somatic and dendritic inhibition from individual INs. Top, medium PV rate (4 spk/s); bottom, high PV rate (9 spk/s).

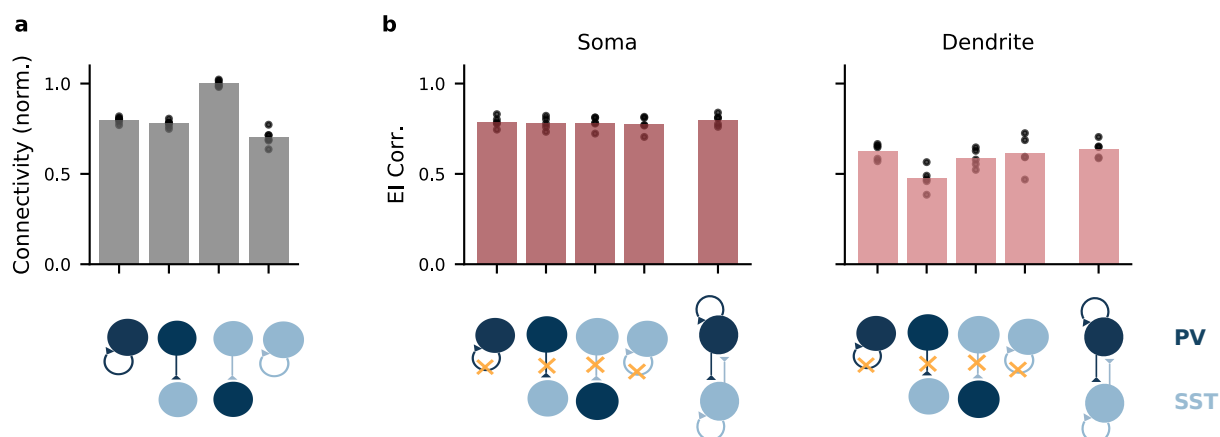

**Figure A.3: Recurrent inhibitory connectivity after learning.** (a) Connectivity between IN populations. From left to right: PV↔PV, PV→SST, SST→PV, SST↔SST. Bars indicate mean over all networks, dots indicate individual networks. (b) Performance as measured by the correlation between excitation and inhibition to PC soma (left) and dendrites (right) of networks optimized lacking specific connections. Data at the very right: EI correlation in network with unconstrained connectivity. Only loss of PV → SST connectivity has a clear effect on dendritic EI correlations. Open circles, mean over 5 batches of 8 stimuli with random amplitudes. Small filled circles, individual batches.

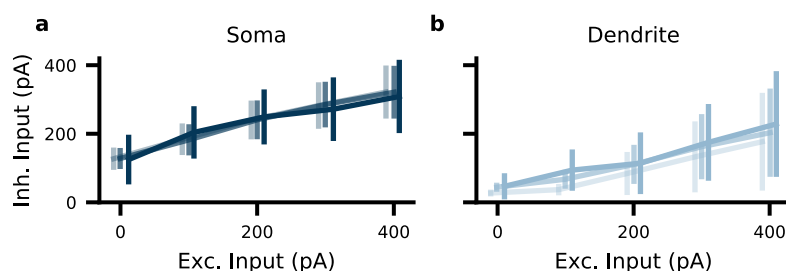

**Figure A.4: Inhibition to one PC compartment is largely independent of excitation to the other compartment.** (a) Somatic inhibition increases with somatic excitation, but is invariant to dendritic excitation. Shading indicates strength of somatic input; bright, medium, dark: 0, 200, and 400 pA, respectively. Positions on *x*-axis are shifted by 10 pA for visual clarity, error bars indicate sd during 10 stimulus repetitions. (b) Dendritic inhibition increases with dendritic excitation, but is only weakly modulated by somatic excitation. Shading indicates strength of dendritic input (0, 200, and 400 pA).

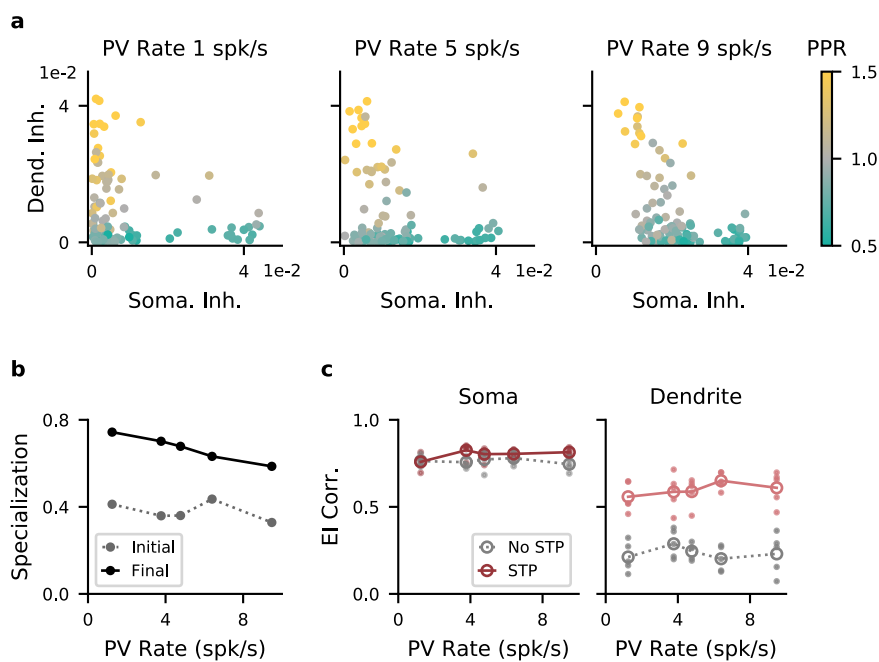

**Figure A.5: Higher baseline PV rates decrease the need for interneuron specialization.** (a) Strength of somatic and dendritic inhibition from individual INs. Left, middle, right: network optimized with a baseline PV rate of 1 (low), 5 (medium), and 9 spk/s (high), respectively. (b) Specialization of IN→E weights. If each IN targets either soma or dendrites, the specialization is 1 (see Methods). Gray: specialization of initial, random network; black: specialization after optimization. (c) Left, correlation between excitation and inhibition as function of minimum PV rate. Red: networks with optimized short-term plasticity. Gray: Networks without short-term plasticity. Open circles, mean over 5 batches of 8 stimuli with random amplitudes. Small filled circles, individual batches.

## 292 B Mathematical Analysis of a Simplified Network Model

293 We performed a mathematical analysis of a simplified network to better understand the following results of  
294 our spiking network simulations:

- 295 1. A compartment-specific balance requires PV  $\rightarrow$  SST inhibition, but no other IN  $\rightarrow$  IN connectivity  
296 (Fig. A.3).
- 297 2. Higher interneuron rates require less IN specialization, i.e., individual interneurons often inhibit both  
298 PC compartments (Fig A.5).

299 The simplified model consists of a population of principal cells (PC) and two populations of interneurons  
300 that we will refer to as parvalbumin (PV)-positive and as somatostatin (SST)-positive cells. The population  
301 activity of the PCs is represented by somatic activity  $e$  and dendritic activity  $b$ . The interneuron activities  
302 are represented by firing rates  $p$  and  $s$ . The four activity variables  $e, b, p, s$  are best thought of as deviations  
303 of the respective activity from baseline. The activity variables can hence be both positive and negative  
304 (ignoring saturation effects that arise when the baseline is very low, see below).

For our analysis, we make the following assumptions: (1) somatic input linearly increases somatic activity  $e$ , (2) dendritic input linearly increases dendritic activity  $b$ , which is in turn assumed to be independent of somatic input/activity (note that the latter assumption deviates from a BAC-firing mechanism [35], but is necessary to obtain a linear model), (3) the activities  $p, s$  of the interneuron populations increase linearly with their input, and (4) short-term plasticity is characterized by a single, static parameter (see below). Because we are interested only in qualitative statements, the analysis is done in terms of unitless variables. The model describes the dynamics of the four activity variables  $e, b, p, s$ :

$$\dot{e} = -e - w^{ep}p + E^e(t), \quad (\text{B.1})$$

$$\dot{b} = -b - w^{bs}s + E^b(t), \quad (\text{B.2})$$

$$\dot{p} = -p + \alpha w^{pe}e + (1 - \alpha)w^{pb}b - w^{ps}s, \quad (\text{B.3})$$

$$\dot{s} = -s + \beta w^{se}e + (1 - \beta)w^{sb}b - w^{sp}p. \quad (\text{B.4})$$

Here, the synaptic weight from population  $y$  to  $x$  is modeled with a non-negative weight  $w^{xy}$  ( $x, y \in \{e, p, s\}$ ;  $e$ : PCs,  $p$ : PV INs,  $s$ : SST INs). The central tenet of this simplified model is that somatic and dendritic activity both generate characteristic spike patterns in PCs—such as events and bursts—which are selectively transmitted by synapses because of short-term plasticity. The parameters  $\alpha, \beta \in [0, 1]$  describe the short-term plasticity of the PC $\rightarrow$ PV and PC $\rightarrow$ SST synapses, respectively.  $\alpha, \beta = 1$  corresponds to synapses that

only transmit somatic activity. If somatic activity generates events and dendritic activity generates bursts, this would require "perfectly depressing" synapses, i.e., synapses that transmit only the first spike of a burst.  $\alpha, \beta = 0$  corresponds to synapses that only transmit dendritic activity. For the case where dendritic activity generates bursts, this requires "perfectly facilitating" synapses that ignore individual spikes and transmit only bursts. We assumed that the projections of the interneurons are specialized, i.e., that PV interneurons inhibit the soma and SST interneurons inhibit the dendrite. We will abandon this assumption in Section B.2. We also excluded inhibitory recurrence within the two populations (PV  $\rightarrow$  PV, SST  $\rightarrow$  SST), because these connections would only change the effective time constant of the respective activation variable. The somata and dendrites of the PCs receive time-varying external inputs  $E^e(t)$  and  $E^b(t)$ , respectively. All activity variables follow leaky dynamics.

The dynamical system can be written as  $\dot{r} = Wr + I$ , where the vector  $r$  contains the activation variables  $r = (e, b, p, s)^T$ ,  $I$  contains the external inputs  $I = (E^e, E^b, 0, 0)^T$ , and  $W$  is the matrix of effective connectivity strengths

$$W = \begin{pmatrix} -1 & 0 & -w^{ep} & 0 \\ 0 & -1 & 0 & -w^{bs} \\ \alpha w^{pe} & (1 - \alpha)w^{pe} & -1 & -w^{ps} \\ \beta w^{se} & (1 - \beta)w^{se} & -w^{sp} & -1 \end{pmatrix}. \quad (\text{B.5})$$

Assuming that the time constant of the network is sufficiently short to adiabatically follow the input currents, we can consider the steady state by setting  $\dot{r} = 0$  and solving for  $r$ :

$$Wr + I = 0 \implies r = -W^{-1}I. \quad (\text{B.6})$$

### 305 B.1 Influence of IN $\rightarrow$ IN connections on compartment-specific E/I balance

In the steady state Eq. (B.6), the IN rates are equal to

$$p = -[W^{-1}]_{31}E^e - [W^{-1}]_{32}E^b, \quad (\text{B.7})$$

$$s = -[W^{-1}]_{41}E^e - [W^{-1}]_{42}E^b. \quad (\text{B.8})$$

Here,  $[W^{-1}]_{ij}$  refers to the element in row  $i$  and column  $j$  of the matrix  $W^{-1}$ . Assuming that the interneurons specialize by inhibiting a single compartment, a necessary (and, up to scaling, sufficient) condition for

compartment-specific balance is that the PV rate  $p$  is proportional to the external input targeting the soma and independent of the input targeting the dendrite. Similarly, the SST rate should be proportional to the external input targeting the dendrite and independent of the input targeting the soma. By Eq. (B.7), a compartment-specific balance hence requires  $[W^{-1}]_{32} = 0$  and  $[W^{-1}]_{41} = 0$ . Computing these matrix entries yields:

$$[W^{-1}]_{32} \propto w^{pe}(1 - \alpha) - w^{ps}w^{se}(1 - \beta) = 0 \quad (\text{B.9})$$

$$[W^{-1}]_{41} \propto -w^{pe}w^{sp}\alpha + w^{se}\beta = 0. \quad (\text{B.10})$$

306 These equations have a simple interpretation. Each of the two terms in  $[W^{-1}]_{32}$  represents a pathway by  
 307 which dendritic activity reaches the PV interneurons. The first term quantifies how much dendritic activity  
 308 reaches PV interneurons via the direct excitatory PC→PV projection, the second represents corresponding  
 309 feedforward inhibition via the PC→SST→PV pathway. If these two pathways cancel, PV activity is inde-  
 310 pendent of dendritic activity. Similarly, the two pathways in  $[W^{-1}]_{41}$  that transmit somatic activity to the  
 311 SST need to cancel.

What is the role of short-term plasticity? For illustration, let us first consider the limiting case of  
 ”perfect” synaptic depression ( $\alpha = 1$ ). Perfectly depressing PC → PV synapses would imply that the PV  
 interneurons only receive somatic activity from the PCs via the direct PC→PV pathway. The condition  
 (B.9) then reduces to

$$[W^{-1}]_{32} \propto -w^{ps}w^{se}(1 - \beta) = 0, \quad (\text{B.11})$$

312 i.e., dendritic activity should not reach PV interneurons via the indirect PC→SST→PV pathway, because this  
 313 would render PV activity dependent on dendritic activity. Because dendritic activity need to be transmitted  
 314 to the SST interneurons to reach an E/I balance in the dendrite, this implies that the SST→PV connection  
 315 should be absent.

316 ”Perfect” synaptic depression ( $\alpha, \beta = 1$ ) or facilitation ( $\alpha, \beta = 0$ ) are hard to implement, certainly by a  
 317 Markram-Tsodyks model in the presence of background activity. However, the effect of imperfect depression  
 318 in the PC→PV connection ( $\alpha < 1$ ) can be compensated by feedforward inhibition along the PC→SST→PV  
 319 pathway. Similarly, imperfect PC→SST facilitation picks up somatic activity, which can then be canceled  
 320 by feedforward inhibition via the PC→PV→SST pathway. The role of IN→IN synapses is therefore to  
 321 complement ”imperfect” short-term plasticity in decoding compartment-specific inputs.

322 The observation that PV→SST connections are the most important IN→IN connections in our model



323 results from "imperfect" facilitation in the excitatory synapses onto SST interneurons. Because events occur  
 324 more frequently than bursts, the excess excitation they trigger in SST interneurons needs to be actively  
 325 cancelled via the PV→SST pathway. The converse SST→PV connection is less critical, because bursts are  
 326 comparatively rare, such that their transmission via PC→PV synapses causes only minor disturbances of  
 327 the compartment-specific E/I balance.

## 328 B.2 Influence of IN baseline firing rates on interneuron specialization

The previous analysis assumed that interneurons were specialized to inhibit a single compartment. When should we expect specialization in the first place? We can investigate this question by extending the simplified model by inhibition from all INs onto all PC compartments:

$$W = \begin{pmatrix} -1 & 0 & -w^{ep} & -w^{es} \\ 0 & -1 & -w^{bp} & -w^{bs} \\ \alpha w^{pe} & (1 - \alpha)w^{pe} & -1 & -w^{ps} \\ \beta w^{se} & (1 - \beta)w^{se} & -w^{sp} & -1 \end{pmatrix}. \quad (\text{B.12})$$

A compartment-specific balance now requires external input to be canceled by the inhibition from both interneurons:

$$E^e = w^{ep}p + w^{es}s, \quad (\text{B.13})$$

$$E^b = w^{bp}p + w^{bs}s. \quad (\text{B.14})$$

329 Without additional constraints, this system has an infinite number of solutions, i.e., weight configurations  
 330 that achieve a compartment-specific balance. However, the simple constraint of low baseline firing rates of  
 331 the interneurons collapses the solution space to the specialized one ( $w^{es} = w^{dp} = 0$ ), for the following reason.

332 The activity variables  $p, s$  represent deviations of the interneurons firing rates from baseline. If the  
 333 baseline is sufficiently high, these deviations can be both positive and negative. In that case, inhibition  
 334 from one interneuron class can be cancelled by disinhibition from the other interneuron class. PV and SST  
 335 interneurons are then both free to respond to both somatic and dendritic activity, as long as the weighted  
 336 sums of the inhibition and disinhibition they provide to PC somata and dendrites mirrors the excitatory  
 337 input to those compartments. There are many ways of doing so.

338 For low baseline firing rates, disinhibition is no longer available, because negative deviations from baseline  
 339 are limited by the fact that activities cannot be negative. For illustration, let us consider the case where

340 both PV and SST neurons have zero baseline activity. By definition, the excitatory signals  $E^{e/b}$  are zero  
341 for baseline activity, because they represent deviations from baseline. Therefore, we can assume that there  
342 exists a moment where the input to one PC compartment is zero, while the input to the other compartment  
343 is positive (e.g.,  $E^e = 0$ ,  $E^b > 0$ ). By Eq. (B.13) and because all weights and rates must be positive,  
344  $w^{ep}p + w^{es}s = 0$  implies that  $w^{ep} = 0$  or  $p = 0$  and  $w^{es} = 0$  or  $s = 0$ . At least one weight has to be non-zero  
345 (otherwise balancing the soma is impossible), and at least one rate has to be non-zero (otherwise balancing  
346 the dendrite is impossible). Without loss of generality we can conclude that  $w^{ep} > 0$ ,  $p = 0$ ,  $w^{es} = 0$ , and  
347  $s > 0$ : The PC soma is only inhibited by the PV neuron. Analogously, the existence of a moment when  
348  $E^b = 0$  but  $E^e > 0$  implies that  $w^{ds} > 0$ ,  $w^{dp} = 0$ , meaning that the PC dendrite is only inhibited by the  
349 SST neuron. If the baseline activity is low, but not strictly zero, this saturation arguments still hold, if  
350 the variations in the firing rates that are required to balance the external input are larger than the baseline  
351 activity. Low baseline firing rates therefore imply interneuron specialization, because they prevent inhibition  
352 and disinhibition from non-specialized neurons to cancel.
